# Supplementary material
Source: PubMed Central journal article supplement (PMC2919055)
Supplement: NIHMS205244-supplement-Supp_Fig_s1-s2.pdf [file NIHMS205244-supplement-Supp_Fig_s1-s2.pdf]

## Supporting Information

### Structure and interactions of the C-terminal metal binding domain of *Archaeoglobus fulgidus* CopA

Sorabh Agarwal,<sup>1</sup> Deli Hong,<sup>2</sup> Nirav K. Desai,<sup>1</sup> Matthew H. Sazinsky,<sup>1,3</sup> José M. Argüello,<sup>2\*</sup> and  
Amy C. Rosenzweig<sup>1\*</sup>

<sup>1</sup>Departments of Biochemistry, Molecular Biology, and Cell Biology and of Chemistry, Northwestern University, Evanston, Illinois 60208

<sup>2</sup>Department of Chemistry and Biochemistry, Worcester Polytechnic Institute, Worcester, Massachusetts 01609

<sup>3</sup>Present address: Department of Chemistry, Pomona College, Claremont, California 91711

\*Correspondence to: Amy C. Rosenzweig, Dept. BMBCB, Northwestern University, 2205 Tech Drive, Evanston, IL 60208, e-mail, [amy@northwestern.edu](mailto:amy@northwestern.edu) or José M. Argüello, Dept. of Chemistry and Biochemistry, Worcester Polytechnic Institute, 100 Institute Rd., Worcester, MA 01609, e-mail, [arguello@wpi.edu](mailto:arguello@wpi.edu).

Grant sponsor: NIH; Grant number: GM58518 (A. C. R.). NSF; Grant number: MCB-0743901 (J. M. A). NIH; Grant number: GM8382 (S. A). NIH; Grant number: GM073457 (M. H. S).

Running title: The C-terminal metal binding domain of CopA

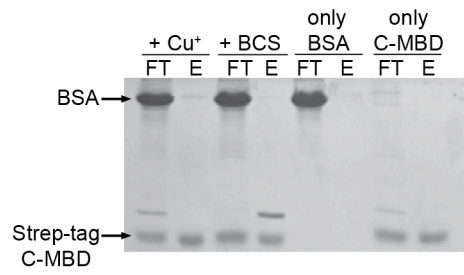

**Figure S1** Absence of interaction between C-MBD and BSA. SDS-PAGE of a representative co-purification assay using streptactin resin. 40% of unbound protein (FT) and 40% of bound protein (E) fractions were loaded in each lane.

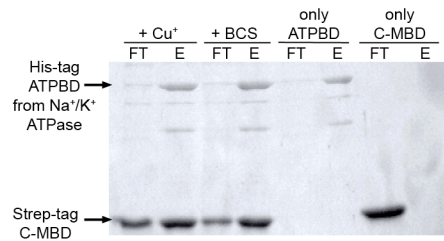

**Figure S2** Interaction assay between C-MBD (20  $\mu$ g) and Na<sup>+</sup>/K<sup>+</sup>-ATPase ATP-BD (49  $\mu$ g). SDS-PAGE of a representative co-purification assay between Na<sup>+</sup>/K<sup>+</sup>-ATPase and either C-MBD or Cu<sup>+</sup>-loaded C-MBD. 40% of unbound protein (FT) and 40% of bound protein (E) fractions were loaded in each lane.
